# Supplementary material for: Stock Market Reactions to COVID-19 Pandemic Outbreak: Quantitative Evidence from ARDL Bounds Tests and Granger Causality Analysis
Source: PubMed Central journal article supplement (PMC7558856; doi:10.3390/ijerph17186729), 2020-09-15
Supplement: ijerph-17-06729-s001.pdf [file ijerph-17-06729-s001.pdf]

## Supplementary Material

**Table S1.** ARDL short-run coefficient estimates for the model Romania and COVID-19 (China) – new cases.

| ARDL – The Number of New Cases in China due to COVID-19 |                  |                 |                  |          |
|---------------------------------------------------------|------------------|-----------------|------------------|----------|
| BET_R                                                   |                  |                 |                  |          |
| Variables                                               | Coefficient      | Std. Error      | t-Statistic      | Prob.    |
| D(SSE100_R)                                             | 0.164481         | 0.103782        | 1.584868         | 0.1191   |
| D(EUR_CNY)                                              | -0.844627        | 0.354823        | -2.380415        | 0.021    |
| D(EUR_CNY(-1))                                          | 1.170755         | 0.372566        | 3.142406         | 0.0028   |
| D(LSCO)                                                 | 0.002462         | 0.000896        | 2.749226         | 0.0082   |
| D(XAU_R)                                                | 0.095487         | 0.04151         | 2.300351         | 0.0255   |
| D(XAU_R(-1))                                            | 0.095401         | 0.054108        | 1.763156         | 0.0837   |
| D(XAU_R(-2))                                            | -0.1817          | 0.048485        | -3.747515        | 0.0004   |
| D(XAU_R(-3))                                            | 0.180338         | 0.043903        | 4.107643         | 0.0001   |
| D(NATURAL_GAS)                                          | 0.101902         | 0.03134         | 3.251525         | 0.002    |
| D(CUSHING_OIL)                                          | 0.002898         | 0.001539        | 1.883225         | 0.0653   |
| D(WTI)                                                  | -0.002608        | 0.001476        | -1.767505        | 0.083    |
| D(WTI(-1))                                              | -0.001469        | 0.000727        | -2.019062        | 0.0487   |
| D(NC_CH)                                                | 0                | 0.000001        | 0.516892         | 0.6074   |
| <b>CointEq(-1)</b>                                      | <b>-1.017783</b> | <b>0.104858</b> | <b>-9.706297</b> | <b>0</b> |
| RO_BOND                                                 |                  |                 |                  |          |
| Variables                                               | Coefficient      | Std. Error      | t-Statistic      | Prob.    |
| D(RO_BOND(-1))                                          | 0.605034         | 0.224319        | 2.697205         | 0.0099   |
| D(RO_BOND(-2))                                          | 0.179495         | 0.142653        | 1.258262         | 0.2151   |
| D(SSE100_R)                                             | -0.458222        | 0.307938        | -1.488034        | 0.144    |
| D(SSE100_R(-1))                                         | 0.416106         | 0.300009        | 1.386977         | 0.1726   |
| D(EUR_CNY)                                              | -3.760744        | 1.162644        | -3.234648        | 0.0023   |
| D(EUR_CNY(-1))                                          | 1.358541         | 1.150085        | 1.181253         | 0.244    |
| D(EUR_CNY(-2))                                          | -1.293318        | 1.134934        | -1.139554        | 0.2608   |
| D(LSCO)                                                 | -0.001214        | 0.00289         | -0.420176        | 0.6764   |
| D(LSCO(-1))                                             | -0.007986        | 0.004673        | -1.709111        | 0.0946   |
| D(XAU_R)                                                | -0.212128        | 0.142993        | -1.483485        | 0.1452   |
| D(XAU_R(-1))                                            | 0.467853         | 0.156634        | 2.986908         | 0.0046   |
| D(NATURAL_GAS)                                          | -0.293654        | 0.101021        | -2.906849        | 0.0058   |
| D(CRUDE_OIL)                                            | -0.005892        | 0.005341        | -1.103109        | 0.2761   |
| D(CRUDE_OIL(-1))                                        | -0.003585        | 0.004966        | -0.721889        | 0.4743   |
| D(CRUDE_OIL(-2))                                        | 0.017481         | 0.005209        | 3.356299         | 0.0017   |
| D(CRUDE_OIL(-3))                                        | -0.009662        | 0.005621        | -1.718914        | 0.0928   |
| D(WTI)                                                  | 0.006377         | 0.005139        | 1.24101          | 0.2213   |
| D(WTI(-1))                                              | -0.000379        | 0.004224        | -0.089743        | 0.9289   |
| D(WTI(-2))                                              | -0.012309        | 0.004136        | -2.975965        | 0.0048   |
| D(WTI(-3))                                              | 0.010707         | 0.004126        | 2.595061         | 0.0129   |
| D(NC_CH)                                                | -0.000003        | 0.000003        | -1.181846        | 0.2438   |
| <b>CointEq(-1)</b>                                      | <b>-1.853068</b> | <b>0.30843</b>  | <b>-6.008062</b> | <b>0</b> |

Source: authors' own calculations. Notes: for the definition of variables, please see Table 1.

**Table S2.** ARDL short-run coefficient estimates for the model Romania and COVID-19 (China) – new deaths.

| ARDL – The Number of New Deaths in China due to COVID-19 |             |            |             |        |
|----------------------------------------------------------|-------------|------------|-------------|--------|
| BET_R                                                    |             |            |             |        |
| Variables                                                | Coefficient | Std. Error | t-Statistic | Prob.  |
| D(SSE100_R)                                              | 0.164935    | 0.103143   | 1.599086    | 0.1159 |
| D(EUR_CNY)                                               | -0.89991    | 0.350557   | -2.56708    | 0.0132 |
| D(EUR_CNY(-1))                                           | 1.131745    | 0.374804   | 3.019567    | 0.0039 |
| D(LSCO)                                                  | 0.002525    | 0.000891   | 2.832864    | 0.0065 |
| D(XAU_R)                                                 | 0.096856    | 0.041342   | 2.342805    | 0.023  |
| D(XAU_R(-1))                                             | 0.093231    | 0.053941   | 1.728372    | 0.0899 |
| D(XAU_R(-2))                                             | -0.18393    | 0.048032   | -3.82925    | 0.0003 |
| D(XAU_R(-3))                                             | 0.175421    | 0.043977   | 3.988903    | 0.0002 |
| D(NATURAL_GAS)                                           | 0.098444    | 0.031355   | 3.139664    | 0.0028 |

|                    |                    |                   |                    |              |
|--------------------|--------------------|-------------------|--------------------|--------------|
| D(CRUDE_OIL)       | 0.002658           | 0.001552          | 1.713054           | 0.0927       |
| D(WTI)             | -0.00247           | 0.001479          | -1.67193           | 0.1005       |
| D(WTI(-1))         | -0.00138           | 0.000732          | -1.88821           | 0.0646       |
| D(ND_CH)           | -3.5E-05           | 0.000042          | -0.83322           | 0.4085       |
| <b>CointEq(-1)</b> | <b>-1.02225</b>    | <b>0.104627</b>   | <b>-9.77043</b>    | <b>0</b>     |
| <b>RO_BOND</b>     |                    |                   |                    |              |
| <b>Variables</b>   | <b>Coefficient</b> | <b>Std. Error</b> | <b>t-Statistic</b> | <b>Prob.</b> |
| D(RO_BOND)         | 0.384412           | 0.133015          | 2.889987           | 0.0059       |
| D(SSE100_R)        | -0.41664           | 0.308217          | -1.35177           | 0.1832       |
| D(SSE100_R(-1))    | 0.393341           | 0.299711          | 1.3124             | 0.196        |
| D(EUR_CNY)         | -3.49695           | 1.078339          | -3.2429            | 0.0022       |
| D(EUR_CNY(-1))     | 1.190246           | 1.107438          | 1.074774           | 0.2882       |
| D(EUR_CNY(-2))     | -2.17048           | 1.117656          | -1.94199           | 0.0584       |
| D(LSCO)            | -0.00167           | 0.002393          | -0.69912           | 0.4881       |
| D(XAU_R)           | -0.2433            | 0.143602          | -1.69427           | 0.0971       |
| D(XAU_R(-1))       | 0.454267           | 0.158975          | 2.857477           | 0.0064       |
| D(NATURAL_GAS)     | -0.19401           | 0.099068          | -1.95839           | 0.0564       |
| D(NATURAL_GAS(-1)) | -0.14978           | 0.106777          | -1.40272           | 0.1676       |
| D(CRUDE_OIL)       | -0.00783           | 0.005125          | -1.52846           | 0.1334       |
| D(CRUDE_OIL(-1))   | -0.00749           | 0.004245          | -1.76391           | 0.0845       |
| D(CRUDE_OIL(-2))   | 0.019834           | 0.005071          | 3.911492           | 0.0003       |
| D(CRUDE_OIL(-3))   | -0.00922           | 0.005183          | -1.77856           | 0.0821       |
| D(WTI)             | 0.007628           | 0.005036          | 1.514727           | 0.1368       |
| D(WTI(-1))         | -0.00095           | 0.004195          | -0.22659           | 0.8218       |
| D(WTI(-2))         | -0.01402           | 0.004002          | -3.50288           | 0.0011       |
| D(WTI(-3))         | 0.011578           | 0.003619          | 3.199502           | 0.0025       |
| D(ND_CH)           | 0.000014           | 0.000133          | 0.103833           | 0.9178       |
| <b>CointEq(-1)</b> | <b>-1.57855</b>    | <b>0.200093</b>   | <b>-7.88908</b>    | <b>0</b>     |

Source: authors' own calculations. Notes: for the definition of variables, please see Table 1.

**Table S3.** ARDL short-run coefficient estimates for the model Romania and COVID-19 (Italy)—new cases.

| <b>ARDL—The Number of New Cases in Italy due to COVID-19</b> |                    |                   |                    |              |
|--------------------------------------------------------------|--------------------|-------------------|--------------------|--------------|
| <b>BET_R</b>                                                 |                    |                   |                    |              |
| <b>Variables</b>                                             | <b>Coefficient</b> | <b>Std. Error</b> | <b>t-Statistic</b> | <b>Prob.</b> |
| D(FTSE_MIB_R)                                                | 0.157907           | 0.058351          | 2.706136           | 0.0091       |
| D(FTSE_MIB_R(-1))                                            | -0.213515          | 0.059457          | -3.591066          | 0.0007       |
| D(FTSE_MIB_R(-2))                                            | 0.092454           | 0.063485          | 1.456327           | 0.1511       |
| D(LSCO)                                                      | 0.003089           | 0.000763          | 4.046168           | 0.0002       |
| D(LSCO(-1))                                                  | -0.001852          | 0.000992          | -1.866385          | 0.0674       |
| D(XAU_R)                                                     | 0.076655           | 0.041669          | 1.839635           | 0.0713       |
| D(XAU_R(-1))                                                 | 0.104701           | 0.049567          | 2.112284           | 0.0393       |
| D(XAU_R(-2))                                                 | -0.074967          | 0.041338          | -1.81353           | 0.0753       |
| D(XAU_R(-3))                                                 | 0.088817           | 0.037073          | 2.395729           | 0.0201       |
| D(NATURAL_GAS)                                               | 0.099548           | 0.028511          | 3.491587           | 0.001        |
| D(CRUDE_OIL)                                                 | 0.00228            | 0.001177          | 1.937014           | 0.058        |
| D(WTI)                                                       | -0.001972          | 0.001102          | -1.788725          | 0.0793       |
| D(NC_IT)                                                     | 0                  | 0.000002          | 0.010324           | 0.9918       |
| <b>CointEq(-1)</b>                                           | <b>-0.954393</b>   | <b>0.127437</b>   | <b>-7.489127</b>   | <b>0</b>     |
| <b>RO_BOND</b>                                               |                    |                   |                    |              |
| <b>Variables</b>                                             | <b>Coefficient</b> | <b>Std. Error</b> | <b>t-Statistic</b> | <b>Prob.</b> |
| D(FTSE_MIB_R)                                                | 0.023339           | 0.218468          | 0.106832           | 0.9154       |
| D(FTSE_MIB_R(-1))                                            | -0.444661          | 0.205025          | -2.168811          | 0.0355       |
| D(LSCO)                                                      | 0.00139            | 0.00284           | 0.489522           | 0.6269       |
| D(LSCO(-1))                                                  | -0.00594           | 0.004608          | -1.289191          | 0.2041       |
| D(XAU_R)                                                     | -0.317075          | 0.15844           | -2.001229          | 0.0516       |
| D(XAU_R(-1))                                                 | 0.466439           | 0.162571          | 2.869146           | 0.0063       |
| D(NATURAL_GAS)                                               | -0.19138           | 0.09544           | -2.005237          | 0.0511       |
| D(NATURAL_GAS(-1))                                           | -0.270018          | 0.114448          | -2.359303          | 0.0228       |
| D(CRUDE_OIL)                                                 | 0.006123           | 0.005008          | 1.222701           | 0.228        |
| D(CRUDE_OIL(-1))                                             | -0.001167          | 0.005122          | -0.227798          | 0.8209       |
| D(CRUDE_OIL(-2))                                             | 0.008228           | 0.006744          | 1.22               | 0.229        |
| D(CRUDE_OIL(-3))                                             | -0.019859          | 0.005687          | -3.492211          | 0.0011       |
| D(WTI)                                                       | -0.004427          | 0.004413          | -1.003185          | 0.3213       |

|                    |                  |                 |                  |          |
|--------------------|------------------|-----------------|------------------|----------|
| D(WTI(-1))         | -0.002618        | 0.004662        | -0.561448        | 0.5773   |
| D(WTI(-2))         | -0.000775        | 0.004786        | -0.161915        | 0.8721   |
| D(WTI(-3))         | 0.020925         | 0.004174        | 5.013635         | 0        |
| D(NC_IT)           | -0.000019        | 0.000017        | -1.088745        | 0.2822   |
| D(NC_IT(-1))       | -0.000021        | 0.000023        | -0.914533        | 0.3654   |
| D(NC_IT(-2))       | 0.000005         | 0.000002        | 2.496999         | 0.0163   |
| D(NC_IT(-3))       | 0.000025         | 0.000014        | 1.695087         | 0.0971   |
| <b>CointEq(-1)</b> | <b>-1.147405</b> | <b>0.124965</b> | <b>-9.181827</b> | <b>0</b> |

Source: authors' own calculations. Notes: for the definition of variables, please see Table 1.

**Table S4.** ARDL short-run coefficient estimates for the model Romania and COVID-19 (Italy)—new deaths.

| <b>ARDL—The Number of New Deaths in Italy due to COVID-19</b> |                    |                   |                    |              |
|---------------------------------------------------------------|--------------------|-------------------|--------------------|--------------|
| <b>BET_R</b>                                                  |                    |                   |                    |              |
| <b>Variables</b>                                              | <b>Coefficient</b> | <b>Std. Error</b> | <b>t-Statistic</b> | <b>Prob.</b> |
| D(BET_R(-1))                                                  | 0.532952           | 0.173004          | 3.080574           | 0.0035       |
| D(BET_R(-2))                                                  | 0.274404           | 0.097833          | 2.80481            | 0.0074       |
| D(FTSE_MIB_R)                                                 | 0.165946           | 0.05213           | 3.183305           | 0.0026       |
| D(FTSE_MIB_R(-1))                                             | -0.30499           | 0.064034          | -4.76296           | 0            |
| D(LSCO)                                                       | 0.00277            | 0.000721          | 3.839906           | 0.0004       |
| D(LSCO(-1))                                                   | -0.00143           | 0.001079          | -1.32193           | 0.1929       |
| D(XAU_R)                                                      | 0.120443           | 0.04283           | 2.812139           | 0.0073       |
| D(XAU_R(-1))                                                  | 0.072502           | 0.050044          | 1.448747           | 0.1543       |
| D(XAU_R(-2))                                                  | -0.08257           | 0.049824          | -1.65722           | 0.1044       |
| D(XAU_R(-3))                                                  | 0.106887           | 0.042383          | 2.521909           | 0.0153       |
| D(NATURAL_GAS)                                                | 0.057822           | 0.026244          | 2.20324            | 0.0327       |
| D(CRUDE_OIL)                                                  | 0.004447           | 0.001288          | 3.453745           | 0.0012       |
| D(WTI)                                                        | -0.00357           | 0.001171          | -3.04672           | 0.0039       |
| D(WTI(-1))                                                    | 0.000768           | 0.000925          | 0.829792           | 0.411        |
| D(WTI(-2))                                                    | -0.00053           | 0.000863          | -0.61551           | 0.5413       |
| D(WTI(-3))                                                    | -0.00135           | 0.00073           | -1.85595           | 0.07         |
| D(ND_IT)                                                      | -2.2E-05           | 0.00003           | -0.7062            | 0.4837       |
| D(ND_IT(-1))                                                  | -2.6E-05           | 0.000034          | -0.7619            | 0.4501       |
| D(ND_IT(-2))                                                  | -7.4E-05           | 0.000032          | -2.35702           | 0.0228       |
| D(ND_IT(-3))                                                  | -0.00007           | 0.000026          | -2.66636           | 0.0106       |
| <b>CointEq(-1)</b>                                            | <b>-1.64781</b>    | <b>0.198051</b>   | <b>-8.32017</b>    | <b>0</b>     |
| <b>RO_BOND</b>                                                |                    |                   |                    |              |
| <b>Variables</b>                                              | <b>Coefficient</b> | <b>Std. Error</b> | <b>t-Statistic</b> | <b>Prob.</b> |
| D(RO_BOND)                                                    | 0.385039           | 0.115268          | 3.340369           | 0.0017       |
| D(FTSE_MIB_R)                                                 | 0.118664           | 0.178892          | 0.663329           | 0.5107       |
| D(FTSE_MIB_R(-1))                                             | -0.5094            | 0.170639          | -2.98523           | 0.0047       |
| D(FTSE_MIB_R(-2))                                             | 0.604848           | 0.166686          | 3.628679           | 0.0008       |
| D(LSCO)                                                       | -0.00402           | 0.002598          | -1.54746           | 0.1291       |
| D(XAU_R)                                                      | 0.079132           | 0.126799          | 0.624075           | 0.5359       |
| D(XAU_R(-1))                                                  | 0.022838           | 0.143089          | 0.159607           | 0.8739       |
| D(XAU_R(-2))                                                  | 0.433998           | 0.138481          | 3.133986           | 0.0031       |
| D(NATURAL_GAS)                                                | -0.19144           | 0.081483          | -2.34943           | 0.0235       |
| D(NATURAL_GAS(-1))                                            | 0.062996           | 0.11798           | 0.533957           | 0.5961       |
| D(NATURAL_GAS(-2))                                            | -0.21711           | 0.082992          | -2.61606           | 0.0122       |
| D(CRUDE_OIL)                                                  | 0.016395           | 0.005028          | 3.26053            | 0.0022       |
| D(CRUDE_OIL(-1))                                              | -0.0152            | 0.003644          | -4.17073           | 0.0001       |
| D(CRUDE_OIL(-2))                                              | 0.015609           | 0.004546          | 3.433366           | 0.0013       |
| D(CRUDE_OIL(-3))                                              | -0.02313           | 0.004526          | -5.11018           | 0            |
| D(WTI)                                                        | -0.01262           | 0.004727          | -2.66936           | 0.0107       |
| D(WTI(-1))                                                    | 0.006931           | 0.003594          | 1.928216           | 0.0604       |
| D(WTI(-2))                                                    | -0.00735           | 0.0037            | -1.98495           | 0.0536       |
| D(WTI(-3))                                                    | 0.022317           | 0.003349          | 6.664448           | 0            |
| D(ND_IT)                                                      | 0.000156           | 0.000101          | 1.540406           | 0.1308       |
| D(ND_IT(-1))                                                  | -0.00045           | 0.000113          | -4.01409           | 0.0002       |
| <b>CointEq(-1)</b>                                            | <b>-1.20485</b>    | <b>0.163461</b>   | <b>-7.37088</b>    | <b>0</b>     |

Source: authors' own calculations. Notes: for the definition of variables, please see Table 1.

**Table S5.** The results of the Granger causality test for world stock indexes, commodities, currencies and COVID-19 variables.

| Null Hypothesis                             | 1st Lag     |          | 2nd Lag     |        | 3rd Lag     |        |
|---------------------------------------------|-------------|----------|-------------|--------|-------------|--------|
|                                             | F-Statistic | Prob.    | F-Statistic | Prob.  | F-Statistic | Prob.  |
| DWTI does not Granger Cause DFCHI_R         | 1.0322      | 0.313    | 0.5527      | 0.5779 | 0.69504     | 0.5584 |
| DFCHI_R does not Granger Cause DWTI         | 1.47337     | 0.2288   | 3.98796     | 0.023  | 2.61148     | 0.0586 |
| DCRUDE_OIL does not Granger Cause DFCHI_R   | 3.49241     | 0.0657   | 1.61731     | 0.2059 | 2.73393     | 0.0506 |
| DFCHI_R does not Granger Cause DCRUDE_OIL   | 3.24732     | 0.0757   | 4.7043      | 0.0122 | 3.235       | 0.0277 |
| DGDAXI_R does not Granger Cause DFCHI_R     | 2.44856     | 0.122    | 1.64928     | 0.1997 | 0.76334     | 0.5187 |
| DFCHI_R does not Granger Cause DGDAXI_R     | 5.6116      | 0.0205   | 2.90486     | 0.0615 | 1.52625     | 0.2159 |
| DDJIA_R does not Granger Cause DFCHI_R      | 2.96338     | 0.0895   | 1.11077     | 0.3351 | 2.36803     | 0.0786 |
| DFCHI_R does not Granger Cause DDJIA_R      | 25.1712     | 0.000004 | 5.24219     | 0.0076 | 3.56303     | 0.0187 |
| DFTSE_R does not Granger Cause DFCHI_R      | 0.59606     | 0.4426   | 0.33488     | 0.7166 | 0.07798     | 0.9717 |
| DFCHI_R does not Granger Cause DFTSE_R      | 6.51566     | 0.0128   | 3.52498     | 0.0349 | 2.07998     | 0.1113 |
| DFTMIB_R does not Granger Cause DFCHI_R     | 16.5192     | 0.0001   | 5.58971     | 0.0056 | 3.70124     | 0.0159 |
| DFCHI_R does not Granger Cause DFTMIB_R     | 4.31817     | 0.0413   | 2.91604     | 0.0609 | 1.86974     | 0.1433 |
| DIBEX35_R does not Granger Cause DFCHI_R    | 4.20107     | 0.044    | 7.96267     | 0.0008 | 3.7264      | 0.0154 |
| DFCHI_R does not Granger Cause DIBEX35_R    | 0.31584     | 0.5759   | 0.38985     | 0.6786 | 0.93954     | 0.4267 |
| DJIA_R does not Granger Cause DFCHI_R       | 1.22506     | 0.2721   | 3.00503     | 0.0561 | 3.49582     | 0.0203 |
| DFCHI_R does not Granger Cause DJIA_R       | 20.2153     | 0.00003  | 7.63484     | 0.001  | 3.97034     | 0.0116 |
| DNATURAL_GAS does not Granger Cause DFCHI_R | 3.99329     | 0.0495   | 5.65658     | 0.0053 | 3.43338     | 0.0219 |
| DFCHI_R does not Granger Cause DNATURAL_GAS | 4.23896     | 0.0431   | 2.30684     | 0.1072 | 2.62814     | 0.0575 |
| DNC_IT does not Granger Cause DFCHI_R       | 1.39317     | 0.2418   | 0.32779     | 0.7216 | 4.08753     | 0.0101 |
| DFCHI_R does not Granger Cause DNC_IT       | 0.59281     | 0.4439   | 0.44849     | 0.6404 | 0.29292     | 0.8304 |
| DND_CH does not Granger Cause DFCHI_R       | 0.04532     | 0.832    | 0.02151     | 0.9787 | 0.02095     | 0.9958 |
| DFCHI_R does not Granger Cause DND_CH       | 0.0093      | 0.9235   | 0.10122     | 0.9039 | 0.09847     | 0.9606 |
| DND_IT does not Granger Cause DFCHI_R       | 1.74723     | 0.1904   | 3.00537     | 0.056  | 1.73521     | 0.1683 |
| DFCHI_R does not Granger Cause DND_IT       | 3.23526     | 0.0763   | 1.28527     | 0.2831 | 5.2365      | 0.0026 |
| DLSCO does not Granger Cause DFCHI_R        | 0.27343     | 0.6026   | 3.68697     | 0.0301 | 3.5286      | 0.0195 |
| DFCHI_R does not Granger Cause DLSCO        | 1.04446     | 0.3102   | 0.75845     | 0.4723 | 1.97998     | 0.1255 |
| DSPX_R does not Granger Cause DFCHI_R       | 2.21746     | 0.1408   | 1.2584      | 0.2905 | 2.13477     | 0.1042 |
| DFCHI_R does not Granger Cause DSPX_R       | 25.3444     | 0.000003 | 4.94291     | 0.0099 | 3.44948     | 0.0214 |
| SSE100_R does not Granger Cause DFCHI_R     | 4.30932     | 0.0415   | 3.74938     | 0.0285 | 3.32022     | 0.025  |
| DFCHI_R does not Granger Cause SSE100_R     | 0.00163     | 0.9679   | 0.02765     | 0.9727 | 1.28404     | 0.2872 |
| EUR_CNY does not Granger Cause DFCHI_R      | 0.65507     | 0.421    | 0.38908     | 0.6792 | 4.71085     | 0.0049 |
| DFCHI_R does not Granger Cause EUR_CNY      | 10.8984     | 0.0015   | 4.23084     | 0.0185 | 5.54855     | 0.0019 |
| NC_CH does not Granger Cause DFCHI_R        | 0.04487     | 0.8328   | 0.03433     | 0.9663 | 0.02894     | 0.9933 |
| DFCHI_R does not Granger Cause NC_CH        | 0.00258     | 0.9596   | 0.10397     | 0.9014 | 0.09209     | 0.9642 |
| XAU_R does not Granger Cause DFCHI_R        | 0.12374     | 0.726    | 4.94469     | 0.0098 | 4.34698     | 0.0074 |
| DFCHI_R does not Granger Cause XAU_R        | 2.7382      | 0.1023   | 3.38374     | 0.0396 | 3.79388     | 0.0142 |
| DCRUDE_OIL does not Granger Cause DWTI      | 0.04638     | 0.8301   | 0.03536     | 0.9653 | 0.1366      | 0.9378 |

|                                             |           |        |         |        |         |           |
|---------------------------------------------|-----------|--------|---------|--------|---------|-----------|
| DWTI does not Granger Cause DCRUDE_OIL      | 0.33334   | 0.5655 | 0.13271 | 0.8759 | 0.28708 | 0.8346    |
| DGDAXI_R does not Granger Cause DWTI        | 1.62603   | 0.2064 | 4.16416 | 0.0196 | 2.67105 | 0.0546    |
| DWTI does not Granger Cause DGDAXI_R        | 0.86963   | 0.3542 | 0.33244 | 0.7183 | 0.33821 | 0.7978    |
| DDJIA_R does not Granger Cause DWTI         | 0.06344   | 0.8019 | 0.29368 | 0.7464 | 0.5449  | 0.6533    |
| DWTI does not Granger Cause DDJIA_R         | 0.02556   | 0.8734 | 0.9586  | 0.3885 | 1.15238 | 0.3346    |
| DFTSE_R does not Granger Cause DWTI         | 0.03581   | 0.8505 | 0.03133 | 0.9692 | 0.07471 | 0.9734    |
| DWTI does not Granger Cause DFTSE_R         | 0.0056    | 0.9406 | 0.14885 | 0.862  | 0.86654 | 0.463     |
| DFTMIB_R does not Granger Cause DWTI        | 4.89114   | 0.0302 | 2.53924 | 0.0863 | 2.78827 | 0.0474    |
| DWTI does not Granger Cause DFTMIB_R        | 0.0000049 | 0.9982 | 1.33258 | 0.2705 | 0.66754 | 0.575     |
| DIBEX35_R does not Granger Cause DWTI       | 0.12272   | 0.7271 | 0.07298 | 0.9297 | 0.26124 | 0.8531    |
| DWTI does not Granger Cause DIBEX35_R       | 0.15983   | 0.6905 | 1.52354 | 0.2252 | 2.46564 | 0.0699    |
| DJIA_R does not Granger Cause DWTI          | 0.77312   | 0.3822 | 0.76788 | 0.4679 | 0.48919 | 0.691     |
| DWTI does not Granger Cause DJIA_R          | 0.01227   | 0.9121 | 2.70482 | 0.074  | 1.46638 | 0.2317    |
| DNATURAL_GAS does not Granger Cause DWTI    | 2.57538   | 0.1129 | 1.45133 | 0.2413 | 1.61733 | 0.1937    |
| DWTI does not Granger Cause DNATURAL_GAS    | 6.36455   | 0.0139 | 3.0785  | 0.0524 | 1.85097 | 0.1465    |
| DNC_IT does not Granger Cause DWTI          | 0.00387   | 0.9506 | 0.005   | 0.995  | 0.01251 | 0.9981    |
| DWTI does not Granger Cause DNC_IT          | 0.5675    | 0.4537 | 1.34092 | 0.2683 | 1.97682 | 0.126     |
| DND_CH does not Granger Cause DWTI          | 0.000032  | 0.9955 | 0.00029 | 0.9997 | 0.00151 | 0.9999    |
| DWTI does not Granger Cause DND_CH          | 0.04681   | 0.8293 | 0.1231  | 0.8844 | 0.10376 | 0.9576    |
| DND_IT does not Granger Cause DWTI          | 1.80644   | 0.1832 | 1.28712 | 0.2826 | 1.13963 | 0.3396    |
| DWTI does not Granger Cause DND_IT          | 0.00362   | 0.9522 | 1.86469 | 0.1627 | 0.91119 | 0.4405    |
| DLSCO does not Granger Cause DWTI           | 35.9252   | 7E-08  | 22.9478 | 2E-08  | 15.107  | 0.0000001 |
| DWTI does not Granger Cause DLSCO           | 0.000015  | 0.997  | 0.0176  | 0.9826 | 0.17202 | 0.9149    |
| DSPX_R does not Granger Cause DWTI          | 0.10215   | 0.7502 | 0.22766 | 0.797  | 0.64805 | 0.587     |
| DWTI does not Granger Cause DSPX_R          | 0.06513   | 0.7993 | 1.16248 | 0.3188 | 1.05948 | 0.3724    |
| SSE100_R does not Granger Cause DWTI        | 0.64236   | 0.4255 | 0.45326 | 0.6374 | 0.25169 | 0.8599    |
| DWTI does not Granger Cause SSE100_R        | 0.27143   | 0.604  | 1.16251 | 0.3187 | 0.83242 | 0.4808    |
| EUR_CNY does not Granger Cause DWTI         | 1.77732   | 0.1867 | 1.13368 | 0.3278 | 0.71534 | 0.5463    |
| DWTI does not Granger Cause EUR_CNY         | 0.00131   | 0.9712 | 0.27024 | 0.764  | 0.30521 | 0.8215    |
| NC_CH does not Granger Cause DWTI           | 0.77665   | 0.3811 | 0.56075 | 0.5734 | 0.4423  | 0.7235    |
| DWTI does not Granger Cause NC_CH           | 0.03989   | 0.8423 | 0.00733 | 0.9927 | 0.02029 | 0.996     |
| XAU_R does not Granger Cause DWTI           | 1.00795   | 0.3188 | 0.70712 | 0.4966 | 0.48752 | 0.6921    |
| DWTI does not Granger Cause XAU_R           | 0.03674   | 0.8485 | 0.0612  | 0.9407 | 1.97534 | 0.1262    |
| DGDAXI_R does not Granger Cause DCRUDE_OIL  | 3.48991   | 0.0658 | 4.55135 | 0.0139 | 3.11406 | 0.032     |
| DCRUDE_OIL does not Granger Cause DGDAXI_R  | 3.09507   | 0.0828 | 2.02053 | 0.1404 | 3.86988 | 0.013     |
| DDJIA_R does not Granger Cause DCRUDE_OIL   | 0.48544   | 0.4882 | 0.3524  | 0.7043 | 1.31087 | 0.2783    |
| DCRUDE_OIL does not Granger Cause DDJIA_R   | 1.14294   | 0.2886 | 4.4382  | 0.0154 | 5.13486 | 0.003     |
| DFTSE_R does not Granger Cause DCRUDE_OIL   | 0.44793   | 0.5055 | 0.29789 | 0.7433 | 0.33352 | 0.8011    |
| DCRUDE_OIL does not Granger Cause DFTSE_R   | 0.53018   | 0.4689 | 2.14829 | 0.1244 | 4.6711  | 0.0051    |
| DFTMIB_R does not Granger Cause DCRUDE_OIL  | 7.43633   | 0.008  | 3.57113 | 0.0334 | 3.52323 | 0.0196    |
| DCRUDE_OIL does not Granger Cause DFTMIB_R  | 0.45608   | 0.5016 | 5.68559 | 0.0052 | 3.28226 | 0.0262    |
| DIBEX35_R does not Granger Cause DCRUDE_OIL | 0.00388   | 0.9505 | 0.4571  | 0.635  | 0.70906 | 0.55      |

|                                                |          |          |         |         |         |        |
|------------------------------------------------|----------|----------|---------|---------|---------|--------|
| DCRUDE_OIL does not Granger Cause DIBEX35_R    | 0.68443  | 0.4108   | 1.81835 | 0.17    | 3.32276 | 0.025  |
| DJIA_R does not Granger Cause DCRUDE_OIL       | 1.93259  | 0.1688   | 1.28783 | 0.2824  | 1.31435 | 0.2772 |
| DCRUDE_OIL does not Granger Cause DJIA_R       | 0.20664  | 0.6508   | 11.9907 | 0.00003 | 6.91535 | 0.0004 |
| DNATURAL_GAS does not Granger Cause DCRUDE_OIL | 0.75092  | 0.3891   | 0.62846 | 0.5364  | 0.7396  | 0.5322 |
| DCRUDE_OIL does not Granger Cause DNATURAL_GAS | 5.32148  | 0.0239   | 3.26022 | 0.0444  | 2.13306 | 0.1044 |
| DNC_IT does not Granger Cause DCRUDE_OIL       | 0.43673  | 0.5108   | 0.25329 | 0.777   | 0.14997 | 0.9294 |
| DCRUDE_OIL does not Granger Cause DNC_IT       | 0.85842  | 0.3573   | 6.99476 | 0.0017  | 4.52423 | 0.006  |
| DND_CH does not Granger Cause DCRUDE_OIL       | 0.000027 | 0.9959   | 0.00036 | 0.9996  | 0.00102 | 1      |
| DCRUDE_OIL does not Granger Cause DND_CH       | 0.04675  | 0.8294   | 0.19138 | 0.8263  | 0.1409  | 0.9351 |
| DND_IT does not Granger Cause DCRUDE_OIL       | 2.16428  | 0.1456   | 1.54238 | 0.2212  | 1.26425 | 0.2939 |
| DCRUDE_OIL does not Granger Cause DND_IT       | 0.81574  | 0.3694   | 3.36692 | 0.0403  | 2.24293 | 0.0914 |
| DLSCO does not Granger Cause DCRUDE_OIL        | 55.5535  | 2E-10    | 32.4142 | 1E-10   | 21.0619 | 1E-09  |
| DCRUDE_OIL does not Granger Cause DLSCO        | 0.08387  | 0.7729   | 0.17351 | 0.8411  | 0.76365 | 0.5185 |
| DSPX_R does not Granger Cause DCRUDE_OIL       | 0.60038  | 0.441    | 0.35354 | 0.7035  | 1.54724 | 0.2106 |
| DCRUDE_OIL does not Granger Cause DSPX_R       | 1.2653   | 0.2644   | 4.40458 | 0.0158  | 4.64199 | 0.0053 |
| SSE100_R does not Granger Cause DCRUDE_OIL     | 0.79141  | 0.3766   | 0.50558 | 0.6054  | 0.37255 | 0.7731 |
| DCRUDE_OIL does not Granger Cause SSE100_R     | 0.00058  | 0.9809   | 1.34096 | 0.2683  | 1.1591  | 0.3321 |
| EUR_CNY does not Granger Cause DCRUDE_OIL      | 1.95867  | 0.1659   | 0.99005 | 0.3768  | 0.57649 | 0.6325 |
| DCRUDE_OIL does not Granger Cause EUR_CNY      | 0.58347  | 0.4475   | 0.71801 | 0.4913  | 1.5959  | 0.1987 |
| NC_CH does not Granger Cause DCRUDE_OIL        | 0.81943  | 0.3684   | 0.59704 | 0.5533  | 0.50298 | 0.6815 |
| DCRUDE_OIL does not Granger Cause NC_CH        | 0.04505  | 0.8325   | 0.01568 | 0.9844  | 0.05372 | 0.9835 |
| XAU_R does not Granger Cause DCRUDE_OIL        | 1.71549  | 0.1944   | 0.94641 | 0.3931  | 0.71995 | 0.5436 |
| DCRUDE_OIL does not Granger Cause XAU_R        | 0.00966  | 0.922    | 0.68399 | 0.508   | 1.67549 | 0.1808 |
| DDJIA_R does not Granger Cause DGDAXI_R        | 2.02381  | 0.1592   | 0.30182 | 0.7404  | 0.91227 | 0.4399 |
| DGDAXI_R does not Granger Cause DDJIA_R        | 19.2245  | 0.00004  | 3.47386 | 0.0365  | 2.34687 | 0.0807 |
| DFTSE_R does not Granger Cause DGDAXI_R        | 0.15996  | 0.6904   | 0.33827 | 0.7142  | 0.14669 | 0.9315 |
| DGDAXI_R does not Granger Cause DFTSE_R        | 2.19778  | 0.1426   | 2.83138 | 0.0658  | 1.56205 | 0.2069 |
| DFTMIB_R does not Granger Cause DGDAXI_R       | 24.5232  | 0.000005 | NA      | NA      | NA      | NA     |
| DGDAXI_R does not Granger Cause DFTMIB_R       | 2.28164  | 0.1353   | NA      | NA      | NA      | NA     |
| DIBEX35_R does not Granger Cause DGDAXI_R      | 5.85346  | 0.0181   | 5.48144 | 0.0062  | 2.3653  | 0.0789 |
| DGDAXI_R does not Granger Cause DIBEX35_R      | 1.40797  | 0.2393   | 0.61265 | 0.5448  | 1.14437 | 0.3378 |
| DJIA_R does not Granger Cause DGDAXI_R         | 2.14646  | 0.1473   | 4.25992 | 0.018   | 3.55824 | 0.0188 |
| DGDAXI_R does not Granger Cause DJIA_R         | 16.7319  | 0.0001   | 6.05048 | 0.0038  | 2.99488 | 0.037  |
| DNATURAL_GAS does not Granger Cause DGDAXI_R   | 2.69808  | 0.1048   | 4.99053 | 0.0095  | 3.07764 | 0.0335 |
| DGDAXI_R does not Granger Cause DNATURAL_GAS   | 3.24359  | 0.0759   | 1.80741 | 0.1718  | 2.16369 | 0.1006 |
| DNC_IT does not Granger Cause DGDAXI_R         | 3.43797  | 0.0678   | 1.64652 | 0.2002  | 3.97768 | 0.0115 |
| DGDAXI_R does not Granger Cause DNC_IT         | 0.59501  | 0.443    | 0.0814  | 0.9219  | 0.04798 | 0.986  |
| DND_CH does not Granger Cause DGDAXI_R         | 0.01006  | 0.9204   | 0.02639 | 0.974   | 0.03935 | 0.9895 |
| DGDAXI_R does not Granger Cause DND_CH         | 0.00087  | 0.9766   | 0.11559 | 0.891   | 0.152   | 0.928  |
| DND_IT does not Granger Cause DGDAXI_R         | 1.27997  | 0.2617   | 2.8797  | 0.0629  | 1.54936 | 0.21   |
| DGDAXI_R does not Granger Cause DND_IT         | 3.61271  | 0.0613   | 1.61968 | 0.2054  | 4.75844 | 0.0046 |
| DLSCO does not Granger Cause DGDAXI_R          | 0.16484  | 0.6859   | 3.00493 | 0.0561  | 3.75742 | 0.0149 |

|                                             |         |           |         |         |         |         |
|---------------------------------------------|---------|-----------|---------|---------|---------|---------|
| DGDAXI_R does not Granger Cause DLSCO       | 0.80225 | 0.3734    | 0.53944 | 0.5855  | 1.6383  | 0.189   |
| DSPX_R does not Granger Cause DGDAXI_R      | 1.71057 | 0.1951    | 0.52275 | 0.5952  | 0.73415 | 0.5353  |
| DGDAXI_R does not Granger Cause DSPX_R      | 21.1133 | 0.00002   | 3.64118 | 0.0314  | 2.46744 | 0.0698  |
| SSE100_R does not Granger Cause DGDAXI_R    | 5.76737 | 0.0189    | 4.1652  | 0.0196  | 3.27016 | 0.0266  |
| DGDAXI_R does not Granger Cause SSE100_R    | 0.01296 | 0.9097    | 0.01452 | 0.9856  | 1.71922 | 0.1716  |
| EUR_CNY does not Granger Cause DGDAXI_R     | 0.50923 | 0.4778    | 0.36964 | 0.6923  | 4.30121 | 0.0078  |
| DGDAXI_R does not Granger Cause EUR_CNY     | 8.85636 | 0.004     | 3.54938 | 0.0341  | 5.51213 | 0.0019  |
| NC_CH does not Granger Cause DGDAXI_R       | 0.03692 | 0.8482    | 0.02577 | 0.9746  | 0.05407 | 0.9833  |
| DGDAXI_R does not Granger Cause NC_CH       | 0.00041 | 0.9839    | 0.10899 | 0.8969  | 0.13106 | 0.9413  |
| XAU_R does not Granger Cause DGDAXI_R       | 0.00014 | 0.9907    | 6.50284 | 0.0026  | 5.26593 | 0.0026  |
| DGDAXI_R does not Granger Cause XAU_R       | 1.93297 | 0.1687    | 2.96586 | 0.0581  | 3.4081  | 0.0225  |
| DFTSE_R does not Granger Cause DDJIA_R      | 14.2748 | 0.0003    | 1.47223 | 0.2365  | 0.93945 | 0.4267  |
| DDJIA_R does not Granger Cause DFTSE_R      | 1.93832 | 0.1681    | 0.23785 | 0.789   | 1.03602 | 0.3825  |
| DFTMIB_R does not Granger Cause DDJIA_R     | 19.7361 | 0.00003   | 5.05384 | 0.0089  | 3.75133 | 0.015   |
| DDJIA_R does not Granger Cause DFTMIB_R     | 0.20288 | 0.6538    | 0.35659 | 0.7013  | 0.62691 | 0.6002  |
| DIBEX35_R does not Granger Cause DDJIA_R    | 24.227  | 0.000005  | 5.38033 | 0.0067  | 3.65992 | 0.0167  |
| DDJIA_R does not Granger Cause DIBEX35_R    | 11.7929 | 0.001     | 2.70431 | 0.074   | 3.51658 | 0.0198  |
| DJIA_R does not Granger Cause DDJIA_R       | 30.4871 | 0.0000005 | NA      | NA      | NA      | NA      |
| DDJIA_R does not Granger Cause DJIA_R       | 4.19757 | 0.0441    | NA      | NA      | NA      | NA      |
| DNATURAL_GAS does not Granger Cause DDJIA_R | 0.57406 | 0.4511    | 3.67162 | 0.0305  | 2.33601 | 0.0817  |
| DDJIA_R does not Granger Cause DNATURAL_GAS | 1.30893 | 0.2564    | 1.10943 | 0.3356  | 1.13681 | 0.3407  |
| DNC_IT does not Granger Cause DDJIA_R       | 8.343   | 0.0051    | 1.64915 | 0.1997  | 2.27506 | 0.088   |
| DDJIA_R does not Granger Cause DNC_IT       | 4.88918 | 0.0302    | 2.24186 | 0.1139  | 2.40846 | 0.0749  |
| DND_CH does not Granger Cause DDJIA_R       | 0.01229 | 0.912     | 0.01122 | 0.9888  | 0.00756 | 0.9991  |
| DDJIA_R does not Granger Cause DND_CH       | 0.01568 | 0.9007    | 0.01215 | 0.9879  | 0.0763  | 0.9726  |
| DND_IT does not Granger Cause DDJIA_R       | 1.84108 | 0.1791    | 0.65972 | 0.5202  | 0.54317 | 0.6545  |
| DDJIA_R does not Granger Cause DND_IT       | 0.12629 | 0.7233    | 5.14002 | 0.0083  | 7.20817 | 0.0003  |
| DLSCO does not Granger Cause DDJIA_R        | 0.26288 | 0.6097    | 0.78767 | 0.4589  | 2.82084 | 0.0456  |
| DDJIA_R does not Granger Cause DLSCO        | 2.91316 | 0.0922    | 3.50326 | 0.0356  | 4.0529  | 0.0105  |
| DSPX_R does not Granger Cause DDJIA_R       | 0.48539 | 0.4882    | 0.58971 | 0.5573  | 0.93295 | 0.4298  |
| DDJIA_R does not Granger Cause DSPX_R       | 0.05804 | 0.8103    | 0.08375 | 0.9198  | 0.79063 | 0.5034  |
| SSE100_R does not Granger Cause DDJIA_R     | 10.408  | 0.0019    | 3.97076 | 0.0233  | 2.59763 | 0.0596  |
| DDJIA_R does not Granger Cause SSE100_R     | 1.05331 | 0.3082    | 0.64063 | 0.5301  | 1.8856  | 0.1406  |
| EUR_CNY does not Granger Cause DDJIA_R      | 0.14185 | 0.7076    | 0.82076 | 0.4443  | 4.25907 | 0.0082  |
| DDJIA_R does not Granger Cause EUR_CNY      | 25.7438 | 0.000003  | 11.6983 | 0.00004 | 9.94987 | 0.00002 |
| NC_CH does not Granger Cause DDJIA_R        | 0.01885 | 0.8912    | 0.01587 | 0.9843  | 0.02449 | 0.9948  |
| DDJIA_R does not Granger Cause NC_CH        | 0.01506 | 0.9027    | 0.01101 | 0.989   | 0.06645 | 0.9775  |
| XAU_R does not Granger Cause DDJIA_R        | 0.286   | 0.5944    | 1.13947 | 0.3259  | 0.87906 | 0.4566  |
| DDJIA_R does not Granger Cause XAU_R        | 4.26441 | 0.0425    | 6.96113 | 0.0018  | 5.35932 | 0.0023  |
| DFTMIB_R does not Granger Cause DFTSE_R     | 15.5429 | 0.0002    | 4.67352 | 0.0125  | 3.65167 | 0.0169  |
| DFTSE_R does not Granger Cause DFTMIB_R     | 2.13102 | 0.1487    | 0.63372 | 0.5337  | 0.35416 | 0.7863  |
| DIBEX35_R does not Granger Cause DFTSE_R    | 11.7367 | 0.001     | 6.74773 | 0.0021  | 3.99477 | 0.0112  |

|                                              |          |         |         |        |         |        |
|----------------------------------------------|----------|---------|---------|--------|---------|--------|
| DFTSE_R does not Granger Cause DIBEX35_R     | 19.8855  | 0.00003 | 10.2522 | 0.0001 | 6.42742 | 0.0007 |
| DJIA_R does not Granger Cause DFTSE_R        | 4.41575  | 0.0391  | 5.17402 | 0.0081 | 3.404   | 0.0226 |
| DFTSE_R does not Granger Cause DJIA_R        | 11.2824  | 0.0013  | 3.56226 | 0.0337 | 1.62933 | 0.191  |
| DNATURAL_GAS does not Granger Cause DFTSE_R  | 4.93847  | 0.0294  | 7.55888 | 0.0011 | 4.43906 | 0.0067 |
| DFTSE_R does not Granger Cause DNATURAL_GAS  | 2.32656  | 0.1316  | 1.39208 | 0.2555 | 2.70531 | 0.0524 |
| DNC_IT does not Granger Cause DFTSE_R        | 2.95784  | 0.0898  | 0.74778 | 0.4772 | 1.86651 | 0.1438 |
| DFTSE_R does not Granger Cause DNC_IT        | 2.59274  | 0.1117  | 2.48971 | 0.0904 | 2.44043 | 0.0721 |
| DND_CH does not Granger Cause DFTSE_R        | 0.06948  | 0.7928  | 0.05505 | 0.9465 | 0.04725 | 0.9863 |
| DFTSE_R does not Granger Cause DND_CH        | 0.00054  | 0.9815  | 0.08663 | 0.9171 | 0.09568 | 0.9622 |
| DND_IT does not Granger Cause DFTSE_R        | 1.1242   | 0.2926  | 1.62113 | 0.2051 | 1.13041 | 0.3432 |
| DFTSE_R does not Granger Cause DND_IT        | 3.40425  | 0.0691  | 1.45758 | 0.2399 | 4.29499 | 0.0079 |
| DLSCO does not Granger Cause DFTSE_R         | 0.0576   | 0.811   | 2.20191 | 0.1183 | 3.97688 | 0.0115 |
| DFTSE_R does not Granger Cause DLSCO         | 2.63216  | 0.1091  | 1.64007 | 0.2014 | 1.30853 | 0.2791 |
| DSPX_R does not Granger Cause DFTSE_R        | 1.38584  | 0.243   | 0.47285 | 0.6252 | 0.8447  | 0.4743 |
| DFTSE_R does not Granger Cause DSPX_R        | 14.7947  | 0.0003  | 1.29385 | 0.2808 | 0.79526 | 0.5009 |
| SSE100_R does not Granger Cause DFTSE_R      | 9.54749  | 0.0028  | 5.002   | 0.0094 | 3.19387 | 0.0291 |
| DFTSE_R does not Granger Cause SSE100_R      | 0.27028  | 0.6047  | 0.19223 | 0.8256 | 1.446   | 0.2374 |
| EUR_CNY does not Granger Cause DFTSE_R       | 0.62828  | 0.4306  | 0.19161 | 0.8261 | 3.52012 | 0.0197 |
| DFTSE_R does not Granger Cause EUR_CNY       | 16.6735  | 0.0001  | 7.01834 | 0.0017 | 6.79576 | 0.0005 |
| NC_CH does not Granger Cause DFTSE_R         | 0.01056  | 0.9184  | 0.04854 | 0.9526 | 0.03194 | 0.9923 |
| DFTSE_R does not Granger Cause NC_CH         | 0.00037  | 0.9846  | 0.09834 | 0.9065 | 0.09516 | 0.9625 |
| XAU_R does not Granger Cause DFTSE_R         | 0.0223   | 0.8817  | 6.61847 | 0.0023 | 4.87305 | 0.004  |
| DFTSE_R does not Granger Cause XAU_R         | 1.56672  | 0.2147  | 4.49184 | 0.0147 | 5.28781 | 0.0025 |
| DIBEX35_R does not Granger Cause DFTMIB_R    | 8.82457  | 0.004   | 3.67991 | 0.0303 | 2.96382 | 0.0384 |
| DFTMIB_R does not Granger Cause DIBEX35_R    | 4.53097  | 0.0367  | 3.44393 | 0.0375 | 2.50402 | 0.0667 |
| DJIA_R does not Granger Cause DFTMIB_R       | 0.0016   | 0.9682  | 0.28714 | 0.7513 | 0.44827 | 0.7193 |
| DFTMIB_R does not Granger Cause DJIA_R       | 0.01825  | 0.8929  | 8.08338 | 0.0007 | 4.85237 | 0.0041 |
| DNATURAL_GAS does not Granger Cause DFTMIB_R | 3.73389  | 0.0573  | 5.03988 | 0.0091 | 3.05921 | 0.0342 |
| DFTMIB_R does not Granger Cause DNATURAL_GAS | 2.65813  | 0.1074  | 1.75077 | 0.1813 | 1.95729 | 0.129  |
| DNC_IT does not Granger Cause DFTMIB_R       | 0.05257  | 0.8193  | 0.16908 | 0.8448 | 1.83906 | 0.1486 |
| DFTMIB_R does not Granger Cause DNC_IT       | 1.76672  | 0.188   | 1.18036 | 0.3133 | 1.04829 | 0.3772 |
| DND_CH does not Granger Cause DFTMIB_R       | 0.000042 | 0.9948  | 0.06194 | 0.94   | 0.03784 | 0.9901 |
| DFTMIB_R does not Granger Cause DND_CH       | 0.04294  | 0.8364  | 0.04892 | 0.9523 | 0.09172 | 0.9644 |
| DND_IT does not Granger Cause DFTMIB_R       | 1.80723  | 0.1831  | 1.54995 | 0.2196 | 1.61776 | 0.1936 |
| DFTMIB_R does not Granger Cause DND_IT       | 0.10253  | 0.7497  | 2.39514 | 0.0987 | 2.90057 | 0.0414 |
| DLSCO does not Granger Cause DFTMIB_R        | 2.06788  | 0.1548  | 2.41525 | 0.0969 | 4.63093 | 0.0053 |
| DFTMIB_R does not Granger Cause DLSCO        | 0.31838  | 0.5743  | 0.39991 | 0.6719 | 0.32891 | 0.8045 |
| DSPX_R does not Granger Cause DFTMIB_R       | 0.3269   | 0.5693  | 0.25185 | 0.7781 | 0.67842 | 0.5684 |
| DFTMIB_R does not Granger Cause DSPX_R       | 21.2133  | 0.00002 | 5.36619 | 0.0068 | 3.89639 | 0.0126 |
| SSE100_R does not Granger Cause DFTMIB_R     | 0.3005   | 0.5852  | 0.46279 | 0.6314 | 0.56648 | 0.639  |
| DFTMIB_R does not Granger Cause SSE100_R     | 4.13707  | 0.0456  | 4.10012 | 0.0207 | 4.18962 | 0.0089 |
| EUR_CNY does not Granger Cause DFTMIB_R      | 0.06545  | 0.7988  | 0.11604 | 0.8906 | 2.2824  | 0.087  |



|                                               |          |          |         |         |         |         |
|-----------------------------------------------|----------|----------|---------|---------|---------|---------|
| DFTMIB_R does not Granger Cause EUR_CNY       | 15.3431  | 0.0002   | 7.8432  | 0.0008  | 7.01151 | 0.0004  |
| NC_CH does not Granger Cause DFTMIB_R         | 0.19227  | 0.6623   | 0.06595 | 0.9362  | 0.04663 | 0.9865  |
| DFTMIB_R does not Granger Cause NC_CH         | 0.25002  | 0.6186   | 0.21448 | 0.8075  | 0.13551 | 0.9385  |
| XAU_R does not Granger Cause DFTMIB_R         | 5.69148  | 0.0196   | 4.67835 | 0.0124  | 4.59801 | 0.0055  |
| DFTMIB_R does not Granger Cause XAU_R         | 0.00709  | 0.9331   | 3.73531 | 0.0287  | 2.80705 | 0.0462  |
| DJIA_R does not Granger Cause DIBEX35_R       | 0.08931  | 0.7659   | 8.4625  | 0.0005  | 6.7593  | 0.0005  |
| DIBEX35_R does not Granger Cause DJIA_R       | 22.8461  | 0.000009 | 8.57193 | 0.0005  | 4.83086 | 0.0042  |
| DNATURAL_GAS does not Granger Cause DIBEX35_R | 6.09195  | 0.016    | 8.98252 | 0.0003  | 5.7801  | 0.0014  |
| DIBEX35_R does not Granger Cause DNATURAL_GAS | 1.59014  | 0.2114   | 0.80711 | 0.4503  | 2.30686 | 0.0847  |
| DNC_IT does not Granger Cause DIBEX35_R       | 3.98298  | 0.0497   | 1.82626 | 0.1687  | 2.29086 | 0.0863  |
| DIBEX35_R does not Granger Cause DNC_IT       | 2.38967  | 0.1265   | 2.72452 | 0.0726  | 2.24478 | 0.0912  |
| DND_CH does not Granger Cause DIBEX35_R       | 0.00011  | 0.9915   | 0.05718 | 0.9445  | 0.04495 | 0.9872  |
| DIBEX35_R does not Granger Cause DND_CH       | 0.00235  | 0.9615   | 0.03658 | 0.9641  | 0.06157 | 0.9798  |
| DND_IT does not Granger Cause DIBEX35_R       | 0.34712  | 0.5576   | 1.24242 | 0.2951  | 1.02918 | 0.3855  |
| DIBEX35_R does not Granger Cause DND_IT       | 2.4936   | 0.1187   | 1.78862 | 0.1749  | 3.89499 | 0.0126  |
| DLSCO does not Granger Cause DIBEX35_R        | 3.90236  | 0.0521   | 3.97109 | 0.0233  | 5.15146 | 0.0029  |
| DIBEX35_R does not Granger Cause DLSCO        | 5.47177  | 0.0221   | 4.41645 | 0.0157  | 3.11121 | 0.0321  |
| DSPX_R does not Granger Cause DIBEX35_R       | 11.0469  | 0.0014   | 2.38596 | 0.0996  | 3.29831 | 0.0257  |
| DIBEX35_R does not Granger Cause DSPX_R       | 25.2302  | 0.000004 | 5.18958 | 0.008   | 3.49572 | 0.0203  |
| SSE100_R does not Granger Cause DIBEX35_R     | 6.66637  | 0.0119   | 8.27035 | 0.0006  | 5.37335 | 0.0023  |
| DIBEX35_R does not Granger Cause SSE100_R     | 0.00111  | 0.9735   | 0.06023 | 0.9416  | 1.44208 | 0.2385  |
| EUR_CNY does not Granger Cause DIBEX35_R      | 6.01201  | 0.0166   | 2.8411  | 0.0652  | 5.29375 | 0.0025  |
| DIBEX35_R does not Granger Cause EUR_CNY      | 17.1513  | 0.00009  | 8.16609 | 0.0007  | 5.86456 | 0.0013  |
| NC_CH does not Granger Cause DIBEX35_R        | 0.00055  | 0.9814   | 0.00037 | 0.9996  | 0.04437 | 0.9875  |
| DIBEX35_R does not Granger Cause NC_CH        | 0.00018  | 0.9893   | 0.03873 | 0.962   | 0.04719 | 0.9863  |
| XAU_R does not Granger Cause DIBEX35_R        | 2.44185  | 0.1225   | 13.2489 | 0.00001 | 9.1124  | 0.00004 |
| DIBEX35_R does not Granger Cause XAU_R        | 2.9133   | 0.0922   | 5.23048 | 0.0077  | 6.38535 | 0.0007  |
| DNATURAL_GAS does not Granger Cause DJIA_R    | 4.0687   | 0.0474   | 3.03054 | 0.0548  | 2.39317 | 0.0763  |
| DJIA_R does not Granger Cause DNATURAL_GAS    | 1.57428  | 0.2136   | 1.00863 | 0.37    | 0.69601 | 0.5578  |
| DNC_IT does not Granger Cause DJIA_R          | 0.06244  | 0.8034   | 1.14317 | 0.3248  | 0.91637 | 0.4379  |
| DJIA_R does not Granger Cause DNC_IT          | 5.36566  | 0.0234   | 2.35201 | 0.1028  | 2.3769  | 0.0778  |
| DND_CH does not Granger Cause DJIA_R          | 0.000098 | 0.9921   | 0.03232 | 0.9682  | 0.02163 | 0.9956  |
| DJIA_R does not Granger Cause DND_CH          | 0.03852  | 0.845    | 0.02501 | 0.9753  | 0.02723 | 0.9939  |
| DND_IT does not Granger Cause DJIA_R          | 0.59426  | 0.4433   | 0.40947 | 0.6656  | 0.32348 | 0.8084  |
| DJIA_R does not Granger Cause DND_IT          | 0.00332  | 0.9542   | 0.00795 | 0.9921  | 3.88076 | 0.0128  |
| DLSCO does not Granger Cause DJIA_R           | 0.34167  | 0.5607   | 0.31661 | 0.7297  | 6.06408 | 0.001   |
| DJIA_R does not Granger Cause DLSCO           | 1.3975   | 0.241    | 1.65485 | 0.1986  | 2.83408 | 0.0448  |
| DSPX_R does not Granger Cause DJIA_R          | 4.5874   | 0.0356   | 1.73876 | 0.1833  | 0.62414 | 0.6019  |
| DJIA_R does not Granger Cause DSPX_R          | 27.9568  | 0.000001 | 5.85658 | 0.0045  | 4.20102 | 0.0088  |
| SSE100_R does not Granger Cause DJIA_R        | 0.10887  | 0.7424   | 0.69733 | 0.5013  | 0.47661 | 0.6996  |
| DJIA_R does not Granger Cause SSE100_R        | 4.34363  | 0.0406   | 3.12198 | 0.0503  | 2.5813  | 0.0607  |
| EUR_CNY does not Granger Cause DJIA_R         | 5.48669  | 0.0219   | 1.32968 | 0.2712  | 4.65458 | 0.0051  |

|                                              |          |           |           |          |          |          |
|----------------------------------------------|----------|-----------|-----------|----------|----------|----------|
| DJIA_R does not Granger Cause EUR_CNY        | 34.5284  | 0.0000001 | 14.6014   | 0.000005 | 10.9528  | 0.000006 |
| NC_CH does not Granger Cause DJIA_R          | 0.12137  | 0.7286    | 0.041     | 0.9599   | 0.01943  | 0.9963   |
| DJIA_R does not Granger Cause NC_CH          | 0.12077  | 0.7292    | 0.09268   | 0.9116   | 0.06255  | 0.9794   |
| XAU_R does not Granger Cause DJIA_R          | 7.7373   | 0.0069    | 3.49038   | 0.0359   | 3.69683  | 0.0159   |
| DJIA_R does not Granger Cause XAU_R          | 1.27667  | 0.2622    | 4.03297   | 0.022    | 4.40173  | 0.0069   |
| DNC_IT does not Granger Cause DNATURAL_GAS   | 0.14623  | 0.7033    | 0.0076    | 0.9924   | 0.32145  | 0.8098   |
| DNATURAL_GAS does not Granger Cause DNC_IT   | 5.70832  | 0.0195    | 2.9576    | 0.0586   | 1.99555  | 0.1232   |
| DND_CH does not Granger Cause DNATURAL_GAS   | 0.00405  | 0.9494    | 1.14548   | 0.324    | 1.47552  | 0.2293   |
| DNATURAL_GAS does not Granger Cause DND_CH   | 0.71795  | 0.3996    | 0.32552   | 0.7233   | 1.2013   | 0.3162   |
| DND_IT does not Granger Cause DNATURAL_GAS   | 3.23609  | 0.0762    | 2.27477   | 0.1105   | 1.46149  | 0.2331   |
| DNATURAL_GAS does not Granger Cause DND_IT   | 1.9116   | 0.1711    | 1.02305   | 0.3649   | 1.13549  | 0.3412   |
| DLSCO does not Granger Cause DNATURAL_GAS    | 9.4399   | 0.003     | 8.61552   | 0.0005   | 5.86559  | 0.0013   |
| DNATURAL_GAS does not Granger Cause DLSCO    | 0.00848  | 0.9269    | 0.00603   | 0.994    | 0.05207  | 0.9842   |
| DSPX_R does not Granger Cause DNATURAL_GAS   | 1.41539  | 0.2381    | 1.11757   | 0.3329   | 1.25479  | 0.2971   |
| DNATURAL_GAS does not Granger Cause DSPX_R   | 0.84894  | 0.3599    | 3.34795   | 0.041    | 2.13607  | 0.104    |
| SSE100_R does not Granger Cause DNATURAL_GAS | 1.25393  | 0.2665    | 1.27236   | 0.2867   | 1.08788  | 0.3605   |
| DNATURAL_GAS does not Granger Cause SSE100_R | 1.19737  | 0.2775    | 1.05447   | 0.3539   | 0.78664  | 0.5056   |
| EUR_CNY does not Granger Cause DNATURAL_GAS  | 3.26436  | 0.075     | 1.98866   | 0.1446   | 1.33854  | 0.2694   |
| DNATURAL_GAS does not Granger Cause EUR_CNY  | 0.05276  | 0.819     | 0.35714   | 0.701    | 0.32804  | 0.8051   |
| NC_CH does not Granger Cause DNATURAL_GAS    | 0.13446  | 0.7149    | 0.18404   | 0.8323   | 1.24256  | 0.3014   |
| DNATURAL_GAS does not Granger Cause NC_CH    | 1.04031  | 0.3112    | 0.44604   | 0.642    | 1.15101  | 0.3352   |
| XAU_R does not Granger Cause DNATURAL_GAS    | 4.13711  | 0.0456    | 2.62288   | 0.0798   | 1.89999  | 0.1382   |
| DNATURAL_GAS does not Granger Cause XAU_R    | 0.58939  | 0.4452    | 0.20339   | 0.8164   | 0.40088  | 0.7528   |
| DND_CH does not Granger Cause DNC_IT         | 0.000029 | 0.9957    | 0.0000094 | 1        | 0.00134  | 0.9999   |
| DNC_IT does not Granger Cause DND_CH         | 0.000078 | 0.993     | 0.000047  | 1        | 0.000067 | 1        |
| DND_IT does not Granger Cause DNC_IT         | 2.15811  | 0.1462    | 2.6905    | 0.075    | 1.91646  | 0.1355   |
| DNC_IT does not Granger Cause DND_IT         | 0.00286  | 0.9575    | 4.02266   | 0.0223   | 5.57975  | 0.0018   |
| DLSCO does not Granger Cause DNC_IT          | 2.76031  | 0.101     | 1.72452   | 0.1859   | 5.8209   | 0.0014   |
| DNC_IT does not Granger Cause DLSCO          | 0.31036  | 0.5792    | 0.18924   | 0.828    | 0.3604   | 0.7818   |
| DSPX_R does not Granger Cause DNC_IT         | 5.2001   | 0.0255    | 2.24586   | 0.1135   | 2.32974  | 0.0824   |
| DNC_IT does not Granger Cause DSPX_R         | 10.765   | 0.0016    | 2.23276   | 0.1149   | 2.42336  | 0.0736   |
| SSE100_R does not Granger Cause DNC_IT       | 1.4542   | 0.2318    | 1.5875    | 0.2118   | 1.87237  | 0.1428   |
| DNC_IT does not Granger Cause SSE100_R       | 3.18273  | 0.0786    | 2.67617   | 0.076    | 2.06989  | 0.1126   |
| EUR_CNY does not Granger Cause DNC_IT        | 0.75398  | 0.3881    | 2.34397   | 0.1035   | 1.51244  | 0.2194   |
| DNC_IT does not Granger Cause EUR_CNY        | 0.57477  | 0.4508    | 0.81844   | 0.4454   | 0.81673  | 0.4892   |
| NC_CH does not Granger Cause DNC_IT          | 0.11465  | 0.7359    | 0.09985   | 0.9051   | 0.07325  | 0.9741   |
| DNC_IT does not Granger Cause NC_CH          | 0.02347  | 0.8787    | 0.01261   | 0.9875   | 0.0118   | 0.9982   |
| XAU_R does not Granger Cause DNC_IT          | 1.77431  | 0.1871    | 1.34858   | 0.2664   | 1.15902  | 0.3321   |
| DNC_IT does not Granger Cause XAU_R          | 1.44568  | 0.2332    | 1.768     | 0.1783   | 1.6365   | 0.1894   |
| DND_IT does not Granger Cause DND_CH         | 0.000022 | 0.9962    | 0.000008  | 1        | 0.000028 | 1        |
| DND_CH does not Granger Cause DND_IT         | 0.00013  | 0.991     | 0.00016   | 0.9998   | 0.00015  | 1        |
| DLSCO does not Granger Cause DND_CH          | 0.01634  | 0.8986    | 0.04048   | 0.9604   | 0.24063  | 0.8677   |

|                                         |         |          |         |         |         |         |
|-----------------------------------------|---------|----------|---------|---------|---------|---------|
| DND_CH does not Granger Cause DLSCO     | 0.02857 | 0.8662   | 0.02025 | 0.98    | 0.04    | 0.9892  |
| DSPX_R does not Granger Cause DND_CH    | 0.00297 | 0.9567   | 0.00222 | 0.9978  | 0.0421  | 0.9884  |
| DND_CH does not Granger Cause DSPX_R    | 0.00026 | 0.9871   | 0.01475 | 0.9854  | 0.01069 | 0.9985  |
| SSE100_R does not Granger Cause DND_CH  | 0.04824 | 0.8268   | 0.26009 | 0.7717  | 0.36761 | 0.7766  |
| DND_CH does not Granger Cause SSE100_R  | 1.13669 | 0.2899   | 0.65103 | 0.5247  | 0.65127 | 0.585   |
| EUR_CNY does not Granger Cause DND_CH   | 0.09353 | 0.7606   | 0.06083 | 0.941   | 0.06099 | 0.9801  |
| DND_CH does not Granger Cause EUR_CNY   | 0.00504 | 0.9436   | 0.02484 | 0.9755  | 0.10162 | 0.9588  |
| NC_CH does not Granger Cause DND_CH     | 11.2291 | 0.0013   | NA      | NA      | NA      | NA      |
| DND_CH does not Granger Cause NC_CH     | 4.4127  | 0.0392   | NA      | NA      | NA      | NA      |
| XAU_R does not Granger Cause DND_CH     | 0.0327  | 0.857    | 0.03085 | 0.9696  | 0.08525 | 0.9679  |
| DND_CH does not Granger Cause XAU_R     | 0.11138 | 0.7395   | 0.31473 | 0.731   | 0.23114 | 0.8744  |
| DLSCO does not Granger Cause DND_IT     | 6.57734 | 0.0124   | 3.75535 | 0.0283  | 3.39436 | 0.0229  |
| DND_IT does not Granger Cause DLSCO     | 0.67079 | 0.4155   | 0.68645 | 0.5068  | 0.46457 | 0.708   |
| DSPX_R does not Granger Cause DND_IT    | 0.09183 | 0.7627   | 5.36107 | 0.0069  | 6.81524 | 0.0005  |
| DND_IT does not Granger Cause DSPX_R    | 1.35856 | 0.2476   | 0.38943 | 0.6789  | 0.3688  | 0.7758  |
| SSE100_R does not Granger Cause DND_IT  | 0.12743 | 0.7222   | 1.71176 | 0.1881  | 1.27148 | 0.2914  |
| DND_IT does not Granger Cause SSE100_R  | 0.24031 | 0.6255   | 0.12002 | 0.8871  | 0.87427 | 0.459   |
| EUR_CNY does not Granger Cause DND_IT   | 0.29555 | 0.5884   | 0.37403 | 0.6893  | 0.46632 | 0.7068  |
| DND_IT does not Granger Cause EUR_CNY   | 3.83749 | 0.054    | 2.60063 | 0.0815  | 1.67336 | 0.1812  |
| NC_CH does not Granger Cause DND_IT     | 0.24026 | 0.6255   | 0.11818 | 0.8887  | 0.04698 | 0.9864  |
| DND_IT does not Granger Cause NC_CH     | 0.0457  | 0.8313   | 0.04246 | 0.9585  | 0.0344  | 0.9914  |
| XAU_R does not Granger Cause DND_IT     | 3.16454 | 0.0795   | 2.20745 | 0.1177  | 3.99518 | 0.0112  |
| DND_IT does not Granger Cause XAU_R     | 2.45655 | 0.1214   | 1.73256 | 0.1844  | 1.3591  | 0.263   |
| DSPX_R does not Granger Cause DLSCO     | 2.95454 | 0.0899   | 3.72306 | 0.0291  | 4.24025 | 0.0084  |
| DLSCO does not Granger Cause DSPX_R     | 0.33126 | 0.5667   | 1.00162 | 0.3726  | 2.86899 | 0.043   |
| SSE100_R does not Granger Cause DLSCO   | 0.00185 | 0.9658   | 0.00169 | 0.9983  | 0.50287 | 0.6816  |
| DLSCO does not Granger Cause SSE100_R   | 1.25257 | 0.2668   | 0.57762 | 0.5639  | 1.21256 | 0.3121  |
| EUR_CNY does not Granger Cause DLSCO    | 0.03557 | 0.8509   | 1.61451 | 0.2064  | 1.27628 | 0.2898  |
| DLSCO does not Granger Cause EUR_CNY    | 3.39143 | 0.0697   | 4.54547 | 0.014   | 3.23325 | 0.0278  |
| NC_CH does not Granger Cause DLSCO      | 1.68844 | 0.198    | 1.02971 | 0.3625  | 0.66915 | 0.574   |
| DLSCO does not Granger Cause NC_CH      | 0.67526 | 0.4139   | 0.28267 | 0.7546  | 0.18786 | 0.9043  |
| XAU_R does not Granger Cause DLSCO      | 2.40403 | 0.1254   | 1.53583 | 0.2225  | 1.19692 | 0.3178  |
| DLSCO does not Granger Cause XAU_R      | 0.12838 | 0.7212   | 0.83923 | 0.4364  | 1.6284  | 0.1912  |
| SSE100_R does not Granger Cause DSPX_R  | 10.5509 | 0.0018   | 4.11792 | 0.0204  | 2.64269 | 0.0565  |
| DSPX_R does not Granger Cause SSE100_R  | 0.87229 | 0.3534   | 0.50506 | 0.6057  | 1.91497 | 0.1357  |
| EUR_CNY does not Granger Cause DSPX_R   | 0.2816  | 0.5973   | 0.68421 | 0.5079  | 3.95873 | 0.0117  |
| DSPX_R does not Granger Cause EUR_CNY   | 25.692  | 0.000003 | 11.6227 | 0.00004 | 9.44451 | 0.00003 |
| NC_CH does not Granger Cause DSPX_R     | 0.00605 | 0.9382   | 0.01081 | 0.9892  | 0.02536 | 0.9945  |
| DSPX_R does not Granger Cause NC_CH     | 0.00236 | 0.9614   | 0.00083 | 0.9992  | 0.0337  | 0.9916  |
| XAU_R does not Granger Cause DSPX_R     | 0.40148 | 0.5283   | 1.12126 | 0.3317  | 0.90945 | 0.4413  |
| DSPX_R does not Granger Cause XAU_R     | 4.6375  | 0.0346   | 6.89006 | 0.0019  | 5.99323 | 0.0011  |
| EUR_CNY does not Granger Cause SSE100_R | 0.66546 | 0.4173   | 0.35047 | 0.7056  | 0.28518 | 0.8359  |

|                                         |         |        |         |        |         |        |
|-----------------------------------------|---------|--------|---------|--------|---------|--------|
| SSE100_R does not Granger Cause EUR_CNY | 3.70951 | 0.058  | 2.76639 | 0.0698 | 2.70096 | 0.0525 |
| NC_CH does not Granger Cause SSE100_R   | 0.52434 | 0.4713 | 1.67175 | 0.1953 | 1.13251 | 0.3423 |
| SSE100_R does not Granger Cause NC_CH   | 0.30891 | 0.58   | 0.1441  | 0.8661 | 0.09123 | 0.9646 |
| XAU_R does not Granger Cause SSE100_R   | 6.9399  | 0.0103 | 3.47216 | 0.0365 | 4.62719 | 0.0053 |
| SSE100_R does not Granger Cause XAU_R   | 0.4711  | 0.4947 | 1.32488 | 0.2724 | 1.17442 | 0.3261 |
| NC_CH does not Granger Cause EUR_CNY    | 0.01545 | 0.9014 | 0.00574 | 0.9943 | 0.02867 | 0.9934 |
| EUR_CNY does not Granger Cause NC_CH    | 0.15987 | 0.6904 | 0.10455 | 0.9009 | 0.09572 | 0.9621 |
| XAU_R does not Granger Cause EUR_CNY    | 6.40469 | 0.0135 | 3.49534 | 0.0357 | 2.32203 | 0.083  |
| EUR_CNY does not Granger Cause XAU_R    | 1.35288 | 0.2486 | 5.58045 | 0.0056 | 3.4705  | 0.0208 |
| XAU_R does not Granger Cause NC_CH      | 0.0473  | 0.8284 | 0.01668 | 0.9835 | 0.04828 | 0.9858 |
| NC_CH does not Granger Cause XAU_R      | 0.02545 | 0.8737 | 0.06236 | 0.9396 | 0.2484  | 0.8622 |

Source: authors' own calculations. Notes: for the definition of variables, please see Table 1.
